# Supplementary material
Source: PubMed Central journal article supplement (PMC6295907)
Supplement: NIHMS1508258-supplement-1.pdf [file NIHMS1508258-supplement-1.pdf]

**Supplemental Table 1**

| <b>HE Histologic scoring system</b>     |                                                                                               |
|-----------------------------------------|-----------------------------------------------------------------------------------------------|
| <b>0</b>                                | no pathology (normal villi and crypts)                                                        |
| <b>1</b>                                | normal villi and crypts with mild increased inflammation                                      |
| <b>2</b>                                | mild, multifocal villous blunting and crypt drop out                                          |
| <b>3</b>                                | moderate, multifocal to coalescing villous blunting and crypt drop out                        |
| <b>4</b>                                | diffuse villous blunting and fusion with abundant crypt drop out                              |
| <b>Masson's trichrome grading scale</b> |                                                                                               |
| <b>0</b>                                | Normal                                                                                        |
| <b>1</b>                                | mild, multifocal increase in collagen within lamina propria and/or submucosa                  |
| <b>2</b>                                | moderate multifocal to coalescing increase in collagen within lamina propria and/or submucosa |
| <b>3</b>                                | moderate to marked and diffuse increase in collagen within lamina propria and/or submucosa    |
