# Supplementary material
Source: PubMed Central journal article supplement (PMC6295907)
Supplement: NIHMS1508258-supplement-2.pdf [file NIHMS1508258-supplement-2.pdf]

**Supplemental Table 2.** Additional Clinical Data for Comparator Patients

| Subject | Pre Chemoradiation Chemo |           |             | Tumor Resection |      | TNM Staging |   |   |       | Survival         |         |
|---------|--------------------------|-----------|-------------|-----------------|------|-------------|---|---|-------|------------------|---------|
|         | FOLFIRINOX               | Gem/Abrax | Gemcitabine | Pre             | Post | T           | N | M | Stage | Progression Free | Overall |
| 1       | -                        | -         | -           | -               | +    | 2           | 0 | 0 | IB    | 26.5             | 54.6    |
| 2       | -                        | -         | -           | -               | -    | 3           | 0 | 0 | IIA   | 2.1              | 46.6    |
| 3       | -                        | -         | -           | -               | -    | 2           | 1 | 0 | IIB   | 5.7              | 22.2    |
| 4       | -                        | -         | -           | -               | -    | 3           | 1 | 0 | IIB   | 19.3             | 21.4    |
| 5       | -                        | -         | -           | -               | -    | 3           | 0 | 0 | IIA   | 10.7             | 20.0    |
| 6       | -                        | -         | -           | -               | -    | 4           | 1 | 0 | III   | 3.4              | 17.2    |
| 7       | -                        | -         | -           | -               | +    | 3           | 0 | 0 | IIA   | 9.6              | 12.7    |
| 8       | -                        | -         | -           | -               | -    | 3           | 0 | 0 | IIA   | 3.0              | 12.7    |
| 9       | -                        | -         | -           | -               | -    | 4           | 0 | 0 | III   | 4.4              | 8.0     |
| 10      | -                        | -         | -           | -               | -    | 3           | 1 | 0 | IIB   | 4.6              | 7.8     |
| 11      | -                        | -         | -           | -               | -    | 3           | 1 | 1 | IV    | 2.5              | 4.9     |
| 12      | -                        | -         | -           | -               | -    | 3           | 0 | 0 | IIA   | 2.2              | 4.5     |
| 13      | -                        | -         | -           | -               | -    | 3           | 0 | 0 | IIA   | 2.4              | 3.8     |
| 14      | -                        | -         | +           | -               | -    | 4           | 1 | 0 | III   | 1.9              | 3.1     |
| 15      | +                        | -         | -           | -               | -    | 3           | 1 | 0 | IIB   | 8.7              | 16.1    |
| 16      | -                        | -         | -           | -               | -    | 2           | 1 | 0 | IIB   | 3.9              | 5.3     |
| 17      | -                        | -         | -           | -               | -    | 3           | 0 | 0 | IIA   | 11.7             | 12.7    |
| 18      | -                        | -         | -           | -               | -    | 3           | 1 | 0 | III   | 4.6              | 5.8     |
| 19      | -                        | -         | -           | -               | -    | 4           | 1 | 0 | III   | 8.8              | 18.3    |
