# Supplementary material
Source: PubMed Central journal article supplement (PMC6295907)
Supplement: NIHMS1508258-supplement-3.pdf [file NIHMS1508258-supplement-3.pdf]

Supplemental Figure 1.

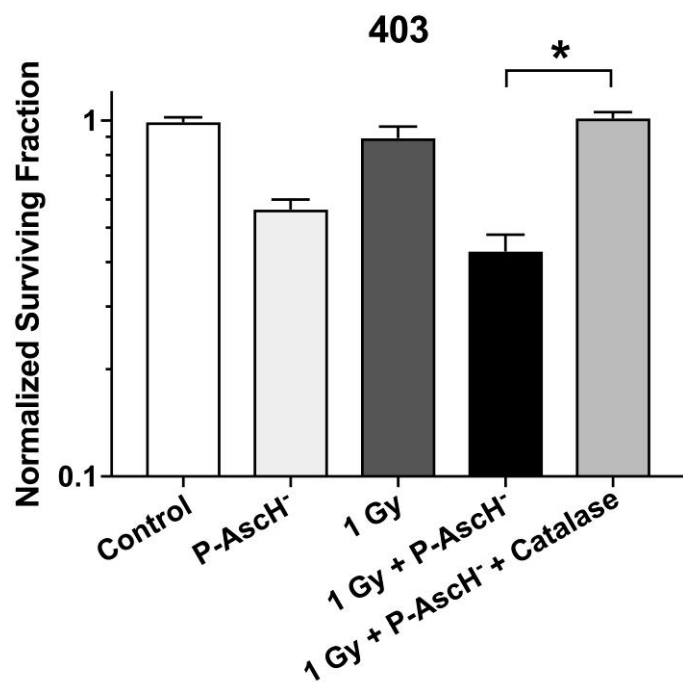

### Supplemental Figure 1. Clonogenic Survival

Pharmacological ascorbate (10 pmol cell<sup>-1</sup>) and irradiation (1Gy) significantly decreased survival in the 403 cell line compared to control. Decreases in clonogenic survival were reversed following the incubation of catalase (200 U/mL) (\*p<0.05).
