# Supplementary material
Source: PubMed Central journal article supplement (PMC6295907)
Supplement: NIHMS1508258-supplement-4.pdf [file NIHMS1508258-supplement-4.pdf]

Supplemental Figure 2.

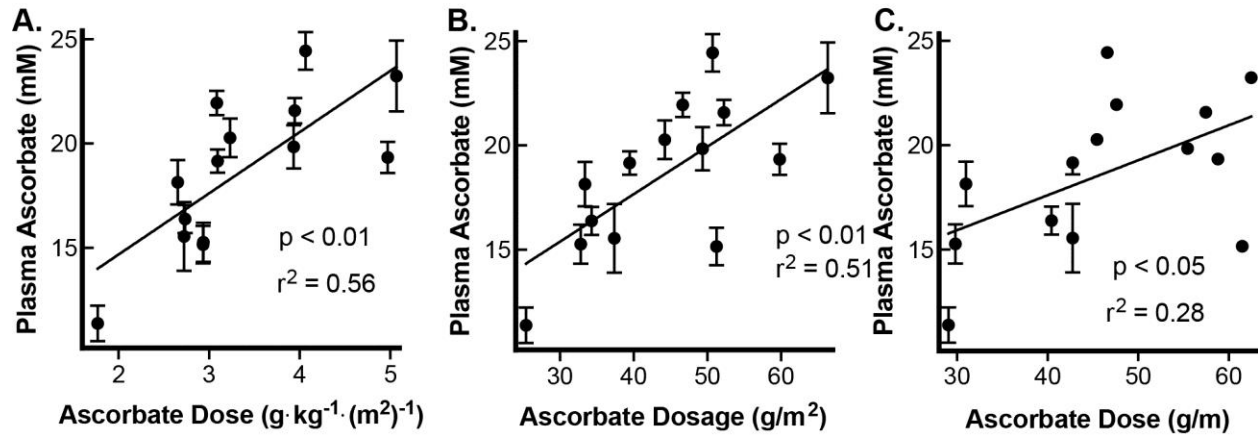

### Supplemental Figure 2. Plasma Ascorbate Concentrations

- A.** Plasma ascorbate concentration as function of Body Mass Index (BMI)-based dosing. BMI-based dose calculated as average BMI of subjects over course of treatment. Linear Regression demonstrates significant non-zero slope and  $R^2 = 0.56$ .
- B.** Plasma ascorbate concentration as function of gram per Body Surface Area (BSA)-dosing. Body Surface area calculated using Du Bois Formula ( $\text{BSA} = 0.0072 \times W^{0.425} \times H^{0.725}$ , where  $W$  = mean weight over study,  $H$  = height)<sup>42</sup>. Linear Regression demonstrates significant non-zero slope and  $R^2 = 0.51$ .
- C.** Plasma ascorbate concentration as function of gram per height (m)-based dosing. Linear Regression demonstrates significant non-zero slope and  $R^2 = 0.28$ .
