# Supplementary material
Source: PubMed Central journal article supplement (PMC6295907)
Supplement: NIHMS1508258-supplement-5.pdf [file NIHMS1508258-supplement-5.pdf]

Supplemental Figure 3.

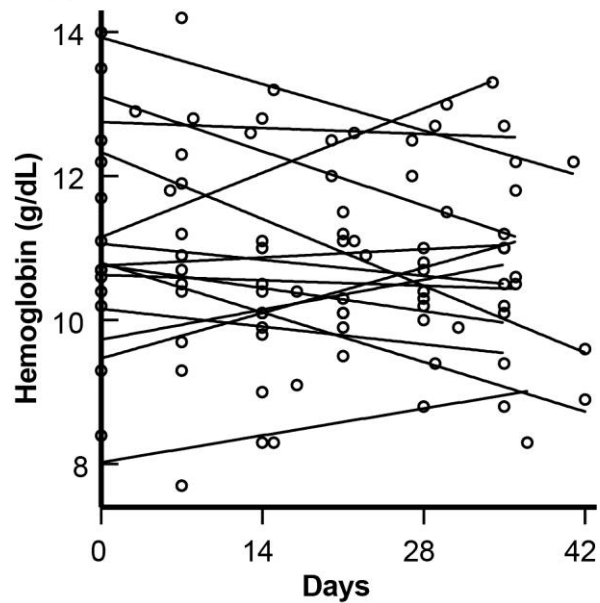

**Supplemental Figure 3.** Individual absolute hemoglobin ( $\text{g dL}^{-1}$ ) over 6 weeks fit to linear regressions. From these linear regressions a “pre” and “post” therapy hemoglobin concentration were calculated to limit variation.
